# Supplementary material for: Intravenous tirofiban therapy for patients with capsular warning syndrome
Source: PubMed Central journal article supplement — Stroke Vasc Neurol. 2019 Jan 9;4(1):22–7. doi: 10.1136/svn-2018-000163 (PMC6475082; doi:10.1136/svn-2018-000163), 2019-01-09
Supplement: svn-2018-000163supp001.pdf [file svn-2018-000163supp001.pdf]

## Supplementary data

**Table I Treatments and outcomes in literatures**

|   | Journal                           | N    | Treatments                                                                                                                                         | Outcomes                                                                       |       |                                          |                   |                                     |
|---|-----------------------------------|------|----------------------------------------------------------------------------------------------------------------------------------------------------|--------------------------------------------------------------------------------|-------|------------------------------------------|-------------------|-------------------------------------|
|   |                                   |      |                                                                                                                                                    | Fluctuations<br>treatments                                                     | after | at 24<br>hours                           | (or<br>discharge) | Follow-up                           |
| 1 | Intern Med.<br>2017 <sup>1</sup>  | 1    | Step 1: argatroban (60 mg),<br>aspirin (100 mg), cilostazol (200<br>mg), atorvastatin (10 mg), and<br>edaravone (60 mg/day);<br>Step 2: rt-PA 80mg | treatments in Step 1 were<br>not effective;<br>no more episode after rt-<br>PA |       | NIHSS 0 with slight<br>right hemiparesis | /                 |                                     |
| 2 | Neurologist.<br>2016 <sup>2</sup> | 2    | Permissive hypertension                                                                                                                            | /                                                                              |       | /                                        |                   | partial resolution                  |
| 3 | Neuroradiol<br>2016 <sup>3</sup>  | J. 1 | t-PA                                                                                                                                               | new episodes and suffered<br>a respiratory failure                             |       | Locked-in                                |                   | remaining the locked-in<br>syndrome |

|   |                                      |    |                                                                                                                                                     |                                                                                                                                       |                                                                                 |                                                                                                               |
|---|--------------------------------------|----|-----------------------------------------------------------------------------------------------------------------------------------------------------|---------------------------------------------------------------------------------------------------------------------------------------|---------------------------------------------------------------------------------|---------------------------------------------------------------------------------------------------------------|
| 4 | J Neurol Sci. 2015 <sup>4</sup>      | 1  | argatroban (60 mg), low molecule dextran and edaravone (60 mg), clopidogrel (75 mg), aspirin and cilostazol (400 mg)                                | The frequency and magnitude gradually attenuated                                                                                      | /                                                                               | /                                                                                                             |
| 5 | Int J Stroke, 2015 <sup>5</sup>      | 42 | 12 patients (28.6%) received rt-PA, other therapy including antiplatelet, vasopressors, anticoagulant therapy                                       | /                                                                                                                                     | A favorable functional outcome at discharge was observed in 36 patients (85.7%) | Nine patients (75%) who received rt-PA and 100% of patients who did not received rt-PA had favorable outcomes |
| 6 | J Cerebrovasc Dis. 2014 <sup>6</sup> | 1  | Step 1: aspirin(200mg/day),cilostazol(200mg/d),atorvastatin(5mg/d),argatroban ,edaravone+plasma expander<br>Step 2: Loading dose clopidogrel(300mg) | Several TIAs occurred repeatedly after step 1. After step 2, three more attacks occurred for 2 hours then no further TIAs thereafter. | Discharged without neurologic deficit 16 days later.                            | /                                                                                                             |
| 7 | Neurologia, 2014 <sup>7</sup>        | 3  | rt-PA                                                                                                                                               | /                                                                                                                                     | NIHSS=1 in 2patients<br>NIHSS=0 in 1 patient                                    | mRS 0 at 3months                                                                                              |

|    |                                                |   |                                                                                      |                                                                                                                      |                                                                                                      |                                                      |
|----|------------------------------------------------|---|--------------------------------------------------------------------------------------|----------------------------------------------------------------------------------------------------------------------|------------------------------------------------------------------------------------------------------|------------------------------------------------------|
| 8  | J Neurol Transl<br>Neurosci. 2014 <sup>8</sup> | 7 | Clopidogrel 300mg                                                                    | /                                                                                                                    | Four the patients had complete resolution. The others were discharged with mild persistent symptoms. | /                                                    |
| 9  | J Neurol Sci.<br>2013 <sup>9</sup>             | 9 | rt-PA                                                                                | Neurological symptoms were fluctuating during rt-PA administration and the course of the next 24 hours in 7 patients | NIHSS median was 7(6-9) at discharge                                                                 | mRs 0-2 in 33% patients                              |
|    |                                                | 9 | Non-rt-PA                                                                            | /                                                                                                                    | NIHSS median was 2.5(0-9.2)at discharge                                                              | mRs 0-2 in 55% patients                              |
| 10 | BMJ Case Rep.<br>2013 <sup>10</sup>            | 1 | Aspirin 300 mg/d,<br>simvastatin 40mg/d,<br>amlodipine 5mg<br>plus clopidogrel 300mg | Further more severe symptoms                                                                                         | 0/5 power in right upper limb;<br>3+/5 in right lower limb;<br>weakness in right face                | was able to walk with the aid of a stick at 6 months |
| 11 | Neurologia ,<br>2013 <sup>11</sup>             | 1 | rt-pa                                                                                | New episode                                                                                                          | NIHSS 8 at discharge (8 days later)                                                                  | /                                                    |

|    |                                             |   |                                                                                                                                         |                                                                                                                    |                                      |                                  |
|----|---------------------------------------------|---|-----------------------------------------------------------------------------------------------------------------------------------------|--------------------------------------------------------------------------------------------------------------------|--------------------------------------|----------------------------------|
| 12 | Cerebrovasc Dis,2013 <sup>12</sup>          | 1 | tPA                                                                                                                                     | Continued to fluctuate per day for 5 days                                                                          | /                                    | Subtly apparent                  |
| 13 | J Clinical Neuroscience, 2012 <sup>13</sup> | 1 | aspirin, high dose of statin,hydration,heperin                                                                                          | 2 further episodes and definite dense hemiplegia;                                                                  | dense hemiplegia                     | Mild hand paresis after 4 months |
| 14 | Neurologist. 2012 <sup>14</sup>             | 2 | clopidogrel 300mg ,aspirin 300mg,IV hydration                                                                                           | No more attacks                                                                                                    | Complete recovery                    | /                                |
| 15 | J Neurol Sci. 2010 <sup>15</sup>            | 1 | Step 1:Intravenous heparin for 6 days, then aspirin 325mg/d and clopidogrel 75mg/d( after loading dose of 225mg)<br>Step 2: Angioplasty | Continued to have TIAs after heparin plus aspirin and clopidogrel<br>No more additional TIAs following angioplasty | /                                    | No symptom at 3 months           |
| 16 | BMC Neurol. 2010 <sup>16</sup>              | 1 | clopidogrel,atorvastatin                                                                                                                | Lasting hemiplegia without recovery                                                                                | NIHSS 5 at discharge (23 days later) | /                                |
| 17 | Rinsho Shinkeigaku. 2010 <sup>17</sup>      | 1 | aspirin, heparin, atorvastatin and t-PA, plasma expander                                                                                | symptoms occurred repeatedly for 22 hours                                                                          | No deficit at 24 hours               | /                                |

|    |                                             |        |    |                                                                                                      |                                                                    |                                                                                               |                         |
|----|---------------------------------------------|--------|----|------------------------------------------------------------------------------------------------------|--------------------------------------------------------------------|-----------------------------------------------------------------------------------------------|-------------------------|
| 18 | J<br>Cerebrovasc<br>Dis. 2010 <sup>18</sup> | Stroke | 11 | antiplatelet agents;<br>one patient with tPA                                                         | Symptomatic fluctuation<br>lasted for 1-7 days                     | /                                                                                             | /                       |
| 19 | Arch Neurol.,<br>2008 <sup>19</sup>         |        | 1  | tPA                                                                                                  | Fluctuated for 12 hours<br>after receiving<br>thrombolytic therapy | NIHSS score is 12 at<br>discharge                                                             | /                       |
| 20 | Cerebrovasc<br>Dis.2008 <sup>20</sup>       |        | 4  | t-PA                                                                                                 | 3/4 patients recovered<br>without new episodes;                    | NIHSS score=0 at<br>discharge in 3 patients;1<br>patient with persistent<br>deficit(NIHSS=12) |                         |
| 21 | Neurocrit Care.<br>2005 <sup>21</sup>       |        | 2  | Patient 1: aspirin 325 mg,<br>clopidogrel 300 mg<br>Patient 2: clopidogrel 300 mg ,<br>aspirin 81 mg | No further episodes                                                | No lasting deficit                                                                            | /                       |
| 22 | Stroke,<br>1993 <sup>22</sup>               |        | 1  | heparin                                                                                              | fluctuations stopped 3<br>days later                               | 0/5 power in arm and<br>leg, with persisting<br>dysarthria                                    | 3/5 power after 3 weeks |

## Reference

1. Fuseya Y, Kawamura M, Matsuda E, et al. rt-PA with Antithrombotic Therapies in a Case with Capsular Warning Syndrome. *Internal Medicine* 2017;56(4):441.
2. Enriquez-Marulanda A, Amaya-Gonzalez P, Orozco JL. Pontine Warning Syndrome: A Chameleon of Ischemic Stroke. *Neurologist* 2016;21(6):93-96.
3. Garcia-Esperon C, Lopez-Cancio E, Martin-Aguilar L, et al. Fluctuating locked-in syndrome as a presentation of a bilateral pontine infarction. *Neuroradiol J* 2016;29(5):347-9. doi: 10.1177/1971400916658896
4. Makita N, Yamamoto Y, Nagakane Y, et al. Very prolonged capsular warning syndrome. *Journal of the Neurological Sciences* 2015;352(1-2):115.
5. Campsrenom P, Delgadomederos R, Martínezdomeño A, et al. Clinical characteristics and outcome of the capsular warning syndrome: a multicenter study. *International Journal of Stroke* 2015;10(4):571-75.
6. Kawano H, Nakajima M, Inatomi Y, et al. Loading dose of clopidogrel in combination with other antithrombotic therapy for capsular warning syndrome. *Journal of Stroke & Cerebrovascular Diseases* 2014;23(5):1265-66.
7. Gonzalez Hernandez A, Fabre Pi O, Cabrera Naranjo F, et al. Intravenous thrombolysis with recombinant tissue plasminogen activator in vascular warning syndromes. *Neurologia* 2014;29(6):334-8. doi: 10.1016/j.nrl.2013.07.005
8. Marsh EB, Llinas RH. Stuttering Lacunes: An Acute Role for Clopidogrel? *Journal of Neurology & Translational Neuroscience* 2014;2(1)
9. Rossana T, Alfonso C, Maurizio A, et al. Stroke warning syndrome: 18 new cases. *Journal of the Neurological Sciences* 2013;331(1-2):168-71.
10. Nadarajan V, Adesina T. Capsular warning syndrome. *Bmj Case Rep* 2013;2013(2013)

11. Gutiérrez RB, García PA, Villanueva Osorio JA, et al. [Intravenous thrombolysis in capsular warning syndrome: is it beneficial?]. *Neurología* 2013;28(7):444-6.
12. Springer MV, Labovitz DL. The Capsular Warning Syndrome Reconsidered. *Cerebrovascular Diseases* 2013;36(2):152-52.
13. Paul NLM, Simoni M, Chandratheva A, et al. Population-based study of capsular warning syndrome and prognosis after early recurrent TIA. *Neurology* 2013;57(1):1356-62.
14. Asil T, Ir N, Karaduman F, et al. Combined antithrombotic treatment with aspirin and clopidogrel for patients with capsular warning syndrome: a case report. *Neurologist* 2012;18(2):68.
15. Lee J, Albers GW, Marks MP, et al. Capsular warning syndrome caused by middle cerebral artery stenosis. *Journal of the Neurological Sciences* 2010;296(1–2):115-20.
16. Huang HW, He SW, Tan SQ, et al. Patient with pontine warning syndrome and bilateral posterior internuclear ophthalmoplegia: case report. *Bmc Neurology* 2010;10(1):1-4.
17. Taguchi Y, Takashima S, Nukui T, et al. [Case of branch atheromatous disease presenting capsular warning syndrome]. *Rinsho Shinkeigaku* 2010;50(5):320-24.
18. Chen ZC, Hu XY, Zhou JJ, et al. Clinical analysis of 11 patients with capsular warning syndrome. 2010
19. Saposnik G, Noel dTL, Caplan LR. Pontine warning syndrome. *Archives of Neurology* 2008;65(10):1375-7.
20. Vivancohidalgo RM, Rodriguezcampello A, Ois A, et al. Thrombolysis in Capsular Warning Syndrome. *Cerebrovascular Diseases* 2008;25(5):508-10.
21. Fahey CD, Alberts MJ, Bernstein RA. Oral clopidogrel load in aspirin-resistant capsular warning syndrome. *Neurocritical Care* 2005;2(2):183-84.

22. Donnan GA, O'Malley HM, Quang L, et al. The capsular warning syndrome: pathogenesis and clinical features. *Neurology* 1993;43(5):957-62.
